# Supplementary material
Source: MDPI journal article supplement (https://www.mdpi.com/2308-3417/6/3/86)
Supplement: s1 [file s1]

**Table S1.** Missing values

|                                | N     | Average | Standard deviation | Missing   |            | Number of outliers |      |
|--------------------------------|-------|---------|--------------------|-----------|------------|--------------------|------|
|                                |       |         |                    | Effective | Percentage | Low                | High |
| Age                            | 53690 | 78.37   | 7.911              | 0         | 0.0        | 0                  | 850  |
| Length of stay                 | 53690 | 12.26   | 16.485             | 0         | 0.0        | 0                  | 1640 |
| Medications at discharge       | 53690 | 7.08    | 5.159              | 0         | 0.0        | 0                  | 1474 |
| Comorbidities                  | 53690 | 5.25    | 2.25852            | 0         | 0.0        | 0                  | 0    |
| Mobility                       | 47996 | 0.43    | 0.495              | 5694      | 10.6       | 0                  | 0    |
| Mobility for changing position | 47997 | 0.30    | 0.458              | 5693      | 10.6       | 0                  | 0    |
| Gait                           | 47997 | 2.97    | 1.916              | 5693      | 10.6       | 0                  | 1967 |
| Fatigue                        | 47995 | 0.47    | 0.499              | 5695      | 10.6       | 0                  | 0    |
| Upper body care                | 47972 | 0.37    | 0.482              | 5718      | 10.7       | 0                  | 0    |
| Lower body care                | 47972 | 0.49    | 0.500              | 5718      | 10.7       | 0                  | 0    |
| Upper body dressing/undressing | 47971 | 0.34    | 0.472              | 5719      | 10.7       | 0                  | 0    |
| Lower body dressing/undressing | 47970 | 0.46    | 0.499              | 5720      | 10.7       | 0                  | 0    |
| Eating                         | 47973 | 0.16    | 0.366              | 5717      | 10.6       | 0                  | 7637 |
| Drinking                       | 47974 | 0.11    | 0.307              | 5716      | 10.6       | 0                  | 5059 |
| Independence in urination      | 47957 | 0.27    | 0.445              | 5733      | 10.7       | 0                  | 0    |
| Bladder continence             | 47960 | 0.32    | 0.466              | 5730      | 10.7       | 0                  | 0    |
| Independence in defecation     | 47960 | 0.23    | 0.423              | 5730      | 10.7       | 0                  | 0    |
| Bowel continence               | 47960 | 0.16    | 0.370              | 5730      | 10.7       | 0                  | 7856 |
| Alertness/consciousness        | 47947 | 0.05    | 0.208              | 5743      | 10.7       | 0                  | 2168 |
| Orientation                    | 47949 | 0.23    | 0.460              | 5741      | 10.7       | 0                  | 831  |
| Ability to learn               | 47949 | 0.29    | 0.453              | 5741      | 10.7       | 0                  | 0    |
| Concentration                  | 47948 | 0.13    | 0.345              | 5742      | 10.7       | 0                  | 5843 |
| Hearing                        | 47943 | 0.15    | 0.375              | 5747      | 10.7       | 0                  | 7067 |
| Vision                         | 47943 | 0.13    | 0.355              | 5747      | 10.7       | 0                  | 5820 |
| Verbal expression              | 47944 | 0.09    | 0.288              | 5746      | 10.7       | 0                  | 4372 |

**Table S2.** Distribution of diagnoses using the International Statistical Classification of Diseases and Related Health Problems (ICD-10) and medications increasing fall and/or delirium risk among polymedicated and non-polymedicated geriatric inpatients.

| ICD-10                                                                                             | Older inpatients aged 65 years old or more (N = 53,690) |                                      |                                          |                      |
|----------------------------------------------------------------------------------------------------|---------------------------------------------------------|--------------------------------------|------------------------------------------|----------------------|
|                                                                                                    | Total n (%)                                             | Polymedicated n (%)<br>36,266 (67.5) | Non polymedicated n (%)<br>17,424 (32.5) | P-value              |
| <b>Number of ICD-10 per geriatric inpatient</b>                                                    |                                                         |                                      |                                          |                      |
| Min–Max                                                                                            | 2–9                                                     | 2–9                                  | 2–9                                      | < 0.001 <sup>a</sup> |
| Mean (SD)                                                                                          | 5.3 (2.3)                                               | 5.7 (2.2)                            | 4.4 (2.2)                                |                      |
| Med [IQR 25–75]                                                                                    | 5 [3–7]                                                 | 6 [4–8]                              | 3 [3–6]                                  |                      |
| <b>Principal ICD-10 diagnosis (Top 10)</b>                                                         |                                                         |                                      |                                          |                      |
| Neoplasms (C00–D48)                                                                                | 5,771 (10.7)                                            | 3,149 (54.6)                         | 2,622 (45.4)                             | < 0.001 <sup>a</sup> |
| Mental and behavioral disorders (F00–F99)                                                          | 3,104 (5.8)                                             | 2,138 (68.9)                         | 966 (31.1)                               | < 0.001 <sup>a</sup> |
| Diseases of the nervous system (G00–G99)                                                           | 1,876 (3.5)                                             | 1,168 (62.3)                         | 708 (37.7)                               | < 0.001 <sup>a</sup> |
| Diseases of the circulatory system (I00–I99)                                                       | 9,386 (17.5)                                            | 6,928 (73.8)                         | 2,458 (26.2)                             | < 0.001 <sup>a</sup> |
| Diseases of the respiratory system (J00–J99)                                                       | 4,278 (8.0)                                             | 3,211 (75.1)                         | 1,067 (24.9)                             | < 0.001 <sup>a</sup> |
| Diseases of the digestive system (K00–K93)                                                         | 4,453 (8.3)                                             | 2,949 (66.2)                         | 1,504 (33.8)                             | < 0.049 <sup>a</sup> |
| Diseases of the musculoskeletal system and connective tissue (M00–M99)                             | 5,071 (9.4)                                             | 3,863 (76.2)                         | 1,208 (23.8)                             | < 0.001 <sup>a</sup> |
| Diseases of the genitourinary system (N00–N99)                                                     | 3,317 (6.2)                                             | 2,134 (64.3)                         | 1,183 (35.7)                             | < 0.001 <sup>a</sup> |
| Congenital malformations, deformations, and chromosomal abnormalities (Q00–Q99)                    | 3,598 (6.7)                                             | 2,101 (58.4)                         | 1,497 (41.6)                             | < 0.001 <sup>a</sup> |
| Symptoms, signs, and abnormal clinical and laboratory findings, not elsewhere classified (R00–R99) | 6,964 (13.0)                                            | 4,583 (65.8)                         | 2,381 (34.2)                             | 0.001 <sup>a</sup>   |
| <b>Medication increasing fall and/or delirium risk</b>                                             |                                                         |                                      |                                          |                      |
| Prescribed                                                                                         | 14,903 (27.8)                                           | 11,396 (32.8)                        | 3,507 (26.6)                             | < 0.001 <sup>a</sup> |
| Not prescribed                                                                                     | 33,041 (61.5)                                           | 23,388 (67.2)                        | 9,653 (73.4)                             | < 0.001 <sup>a</sup> |

<sup>a</sup> Chi-square test    <sup>b</sup> Wilcoxon–Mann–Whitney test
